# Supplementary material for: Selective dealloying of chemically disordered Pt–Ni bimetallic nanoparticles for the oxygen reduction reaction
Source: Royal Society of Chemistry journal article supplement (doi:10.1039/d2nr02677e), 2022-07-12
Supplement: d2nr02677e1.pdf [file d2nr02677e1.pdf]

## Electronic Supplementary Information

### **Selective dealloying of chemically disordered Pt-Ni bimetallic nanoparticles for the oxygen reduction reaction**

Tae-Yeol Jeon,<sup>\*a</sup> Han-Koo Lee,<sup>a</sup> Geon-Hee Yoon,<sup>b</sup> Si-Hwan Lee,<sup>b</sup> Hyung Joong Yun,<sup>c</sup> Ki-Jeong Kim,<sup>a</sup> Kug-Seung Lee,<sup>a</sup> Nicola Pinna,<sup>d</sup> and Seung-Ho Yu<sup>\*b</sup>

<sup>a</sup>Pohang Accelerator Laboratory (PAL), Pohang University of Science and Technology, Pohang 37673, Republic of Korea

<sup>b</sup>Department of Chemical and Biological Engineering, Korea University, Seoul 02841, Republic of Korea

<sup>c</sup>Research Center for Materials Analysis, Korea Basic Science Institute (KBSI), Daejeon 34133, Republic of Korea

<sup>d</sup>Institute für Chemie and IRIS Adlershof, Humboldt-Universität zu Berlin, Brook-Taylor-Str. 2, 12489 Berlin, Germany

\*Corresponding authors: tjeon@postech.ac.kr (T.-Y. Jeon), seunghoyu@korea.ac.kr (S.-H. Yu)

## Table of Contents

### Supplementary Tables

Supplementary Table 1 .....3

Supplementary Table 2 .....4

Supplementary Table 3 .....5

### Supplementary Figures

Supplementary Fig. 1 .....6

Supplementary Fig. 2 .....7

Supplementary Fig. 3 .....8

Supplementary Fig. 4 .....9

Supplementary Fig. 5 .....10

Supplementary Fig. 6 .....11

### Supplementary Information

Supplementary Info. 1 .....12

### References for ESI

References for ESI .....13

## Supplementary Tables

**Table S1** Chemical composition from ED-XRF, peak position of (220) peak from XRD, and the resulting lattice parameter and alloying level.

| Catalyst | Atomic ratio by ED-XRF (%) |          |                                  | XRD                 |                                    |                                 |
|----------|----------------------------|----------|----------------------------------|---------------------|------------------------------------|---------------------------------|
|          | Pt (at%)                   | Ni (at%) | Metal loading (wt%) <sup>a</sup> | 2 $\theta$ of (220) | Lattice parameter (Å) <sup>b</sup> | Alloying level (%) <sup>c</sup> |
| PR       | 55.8                       | 44.2     | 38.1                             | 55.070              | 3.793                              | 74.9                            |
| HQ1      | 65.2                       | 34.8     | 35.7                             | 54.933              | 3.802                              | 95.2                            |
| HQ2      | 65.8                       | 34.2     | 35.6                             | 54.770              | 3.812                              | 89.2                            |
| HQ3      | 67.8                       | 32.2     | 35.1                             | 54.685              | 3.817                              | 90.6                            |
| HQ4      | 68.8                       | 31.2     | 34.9                             | 54.630              | 3.821                              | 91.5                            |
| HQ5      | 69.1                       | 30.9     | 33.5                             | 54.557              | 3.826                              | 93.5                            |
| SA1      | 73.6                       | 26.4     | 34.1                             | 54.409              | 3.835                              | 93.6                            |
| SA2      | 75.3                       | 24.7     | 33.8                             | 54.141              | 3.853                              | 82.0                            |
| SA3      | 77.5                       | 22.5     | 33.4                             | 54.073              | 3.857                              | 85.3                            |
| SA4      | 78.1                       | 21.9     | 33.3                             | 54.016              | 3.861                              | 83.2                            |
| SA5      | 78.4                       | 21.6     | 33.3                             | 53.972              | 3.864                              | 81.2                            |

<sup>a</sup>metal loading was calculated with Pt-to-Ni ratios under the assumption of the complete reduction of Pt precursor (PtCl<sub>4</sub>).

<sup>b</sup>lattice parameter was calculated with the peak position of (220).

<sup>c</sup>alloying level indicates how close to Vegard's line the lattice parameter is.

**Table S2** Summary of the surface areas and activities determined by electrochemical methods.

| Catalysts | $Q_H^a$<br>(mC) | $\text{ECSA}_H^b$<br>(m <sup>2</sup> /g <sub>Pt</sub> ) | $E_{1/2}^c$<br>(V) | $i_k^d$<br>(A/g <sub>Pt</sub> at 0.9 V) |
|-----------|-----------------|---------------------------------------------------------|--------------------|-----------------------------------------|
| Pt/C      | 742             | 63.7                                                    | 0.899              | 65.0                                    |
| PR        | 292             | 45.0                                                    | 0.883              | 82.8                                    |
| HQ1       | 338             | 52.0                                                    | 0.907              | 135.9                                   |
| HQ2       | 306             | 47.1                                                    | 0.911              | 146.6                                   |
| HQ3       | 385             | 43.9                                                    | 0.898              | 114.9                                   |
| HQ4       | 263             | 40.5                                                    | 0.893              | 102.0                                   |
| HQ5       | 279             | 43.0                                                    | 0.897              | 113.3                                   |
| SA1       | 245             | 37.8                                                    | 0.887              | 91.0                                    |
| SA2       | 253             | 38.9                                                    | 0.884              | 83.4                                    |
| SA3       | 228             | 35.1                                                    | 0.881              | 78.0                                    |
| SA4       | 199             | 30.6                                                    | 0.887              | 89.1                                    |
| SA5       | 168             | 25.8                                                    | 0.889              | 93.2                                    |

<sup>a</sup>Charge of hydrogen desorption.

<sup>b</sup>Mass<sub>Pt</sub>-specific electrochemical active surface area (ECSA).

<sup>c</sup>Half-wave potential.

<sup>d</sup>Mass<sub>Pt</sub>-specific ORR activity.

**Table S3** *d*-band centers of Pt-Ni catalysts and commercial Pt/C at 140 eV and 400 eV of photon energies.

| Catalysts | <i>d</i> -band center relative to Fermi level (eV) |       |                  |       |
|-----------|----------------------------------------------------|-------|------------------|-------|
|           | h $\nu$ = 140 eV                                   |       | h $\nu$ = 400 eV |       |
| Pt/C      | -7.63                                              | -6.56 | Pt/C             | -7.63 |
| PR        | -5.69                                              | -5.97 | PR               | -5.69 |
| HQ1       | -5.38                                              | -5.26 | HQ(1)            | -5.38 |
| HQ2       | -6.18                                              | -5.08 | HQ(2)            | -6.18 |
| HQ3       | -6.61                                              | -4.81 | HQ(3)            | -6.61 |
| HQ4       | -6.54                                              | -5.35 | HQ(4)            | -6.54 |
| HQ5       | -6.42                                              | -4.77 | HQ(5)            | -6.42 |
| SA1       | -6.66                                              | -5.98 | SA(1)            | -6.66 |
| SA2       | -6.84                                              | -5.98 | SA(2)            | -6.84 |
| SA3       | -6.74                                              | -5.35 | SA(3)            | -6.74 |
| SA4       | -7.11                                              | -5.81 | SA(4)            | -7.11 |
| SA5       | -7.12                                              | -5.70 | SA(5)            | -7.12 |

## Supplementary Figures

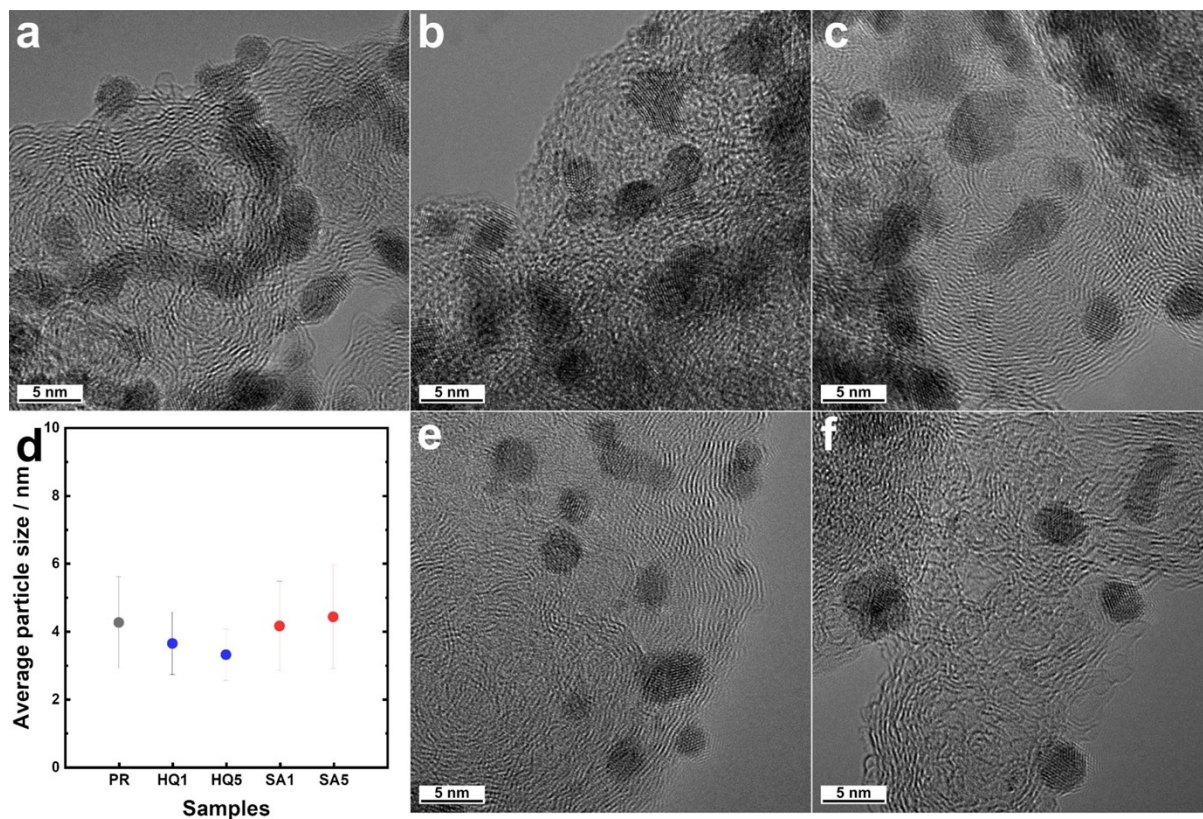

**Fig. S1** TEM images and particle size distribution. Transmission electron micrograph of (a) PR, (b) HQ1, (c) HQ5, (e) SA1 and (f) SA5, and (d) their average particle diameters.

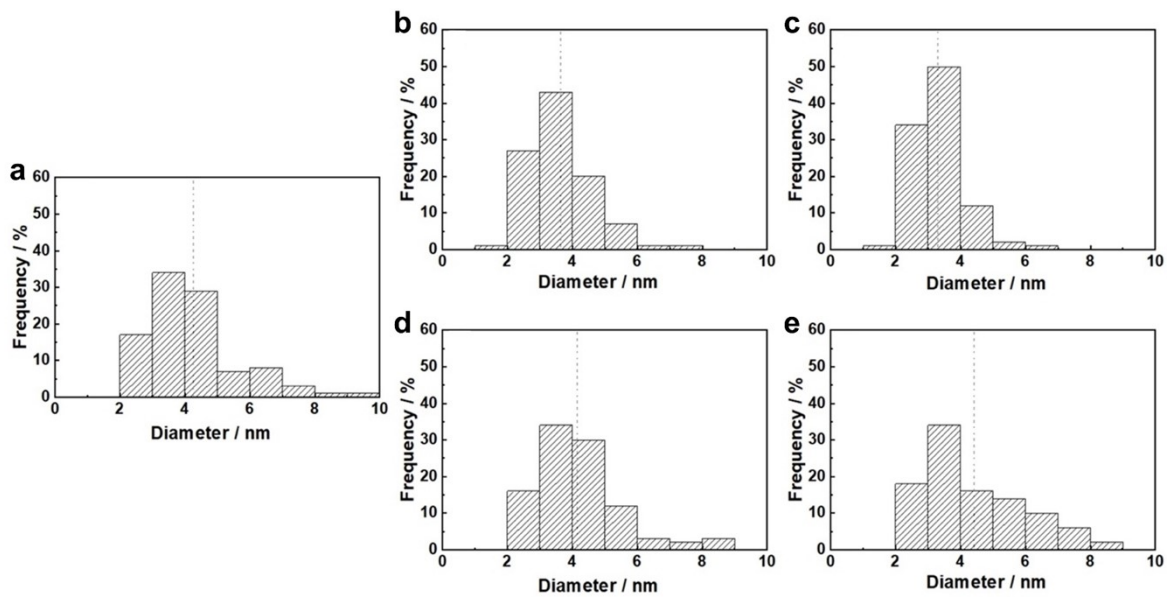

**Fig. S2** Particle size distribution histograms of (a) PR, (b) HQ1, (c) HQ5, (d) SA1, and (e) SA5.

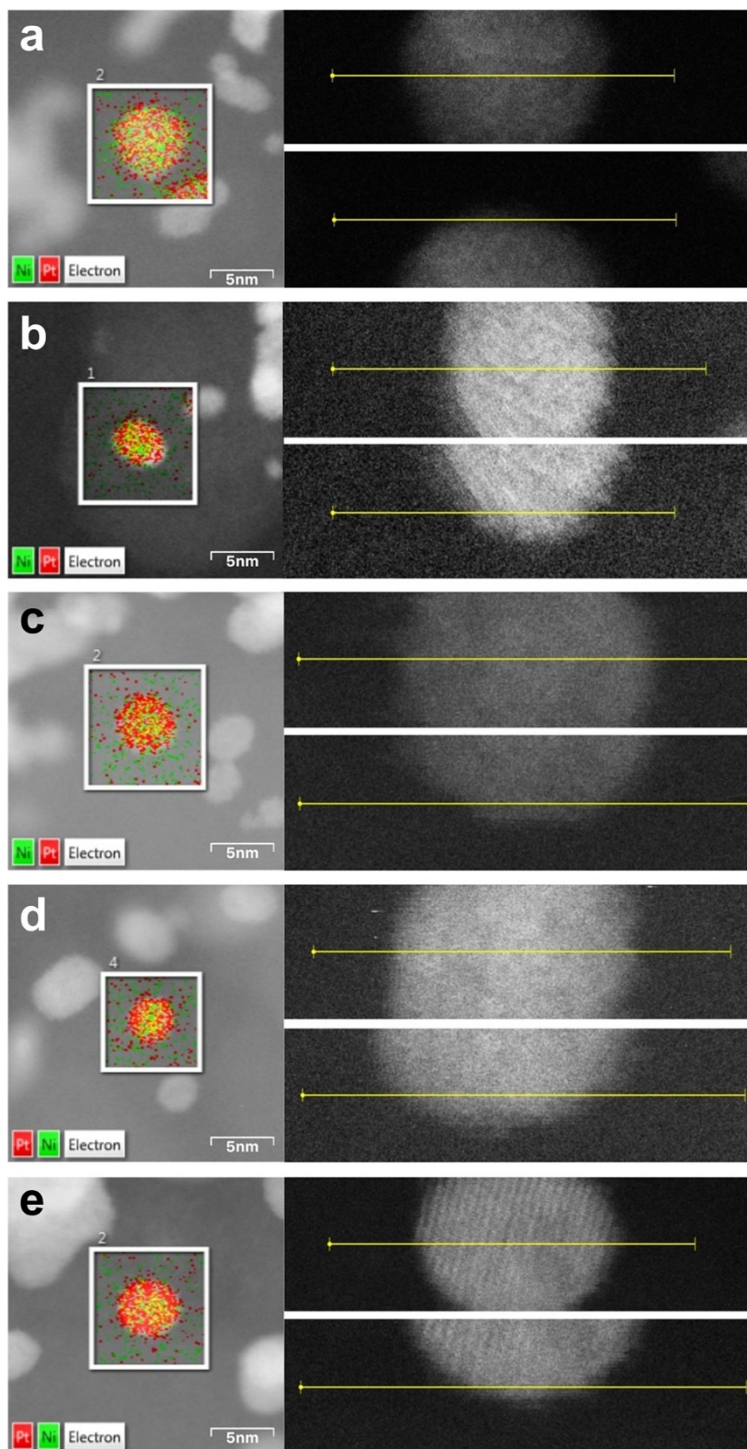

**Fig. S3** TEM mapping and line scanning. High-magnification STEM image with EDS mapping of (a) PR, (b) HQ1, (c) HQ5, (d) SA1, and (e) SA5. For each catalyst, EDS line scan images are also shown on the right part and their data are plotted in **Fig. 2**.



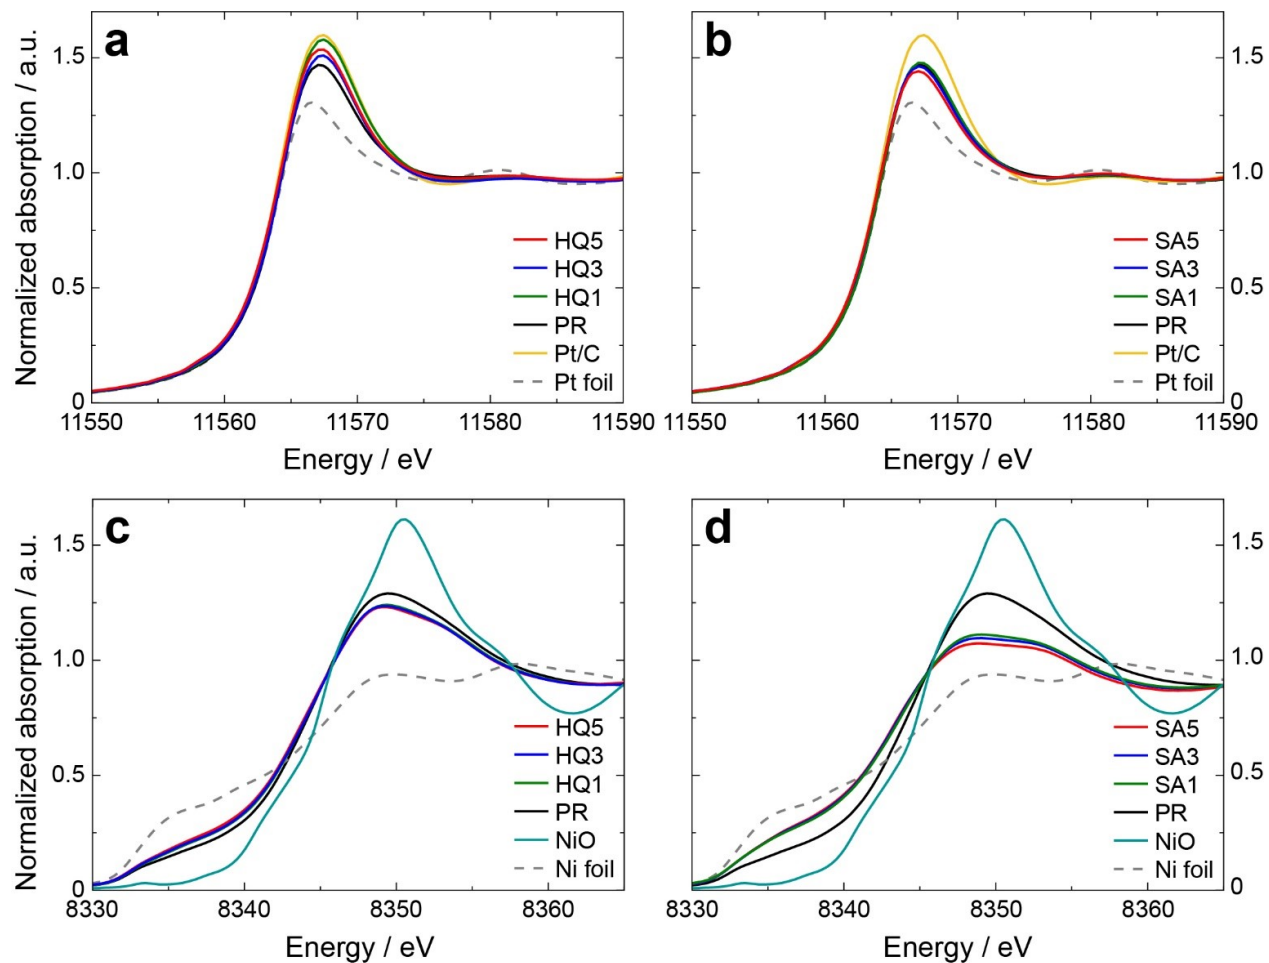

**Fig. S4** X-ray absorption near edge structures of Pt L<sub>3</sub>- and Ni K-edges. Pt L<sub>3</sub>-edge absorption spectra of (a) HQ- and (b) SA-treated Pt-Ni/C. Ni K-edge absorption spectra of (a) HQ- and (b) SA-treated Pt-Ni/C. Both NiO and Ni foil are measured to calculate the oxidation states of Ni in Pt-Ni catalysts.

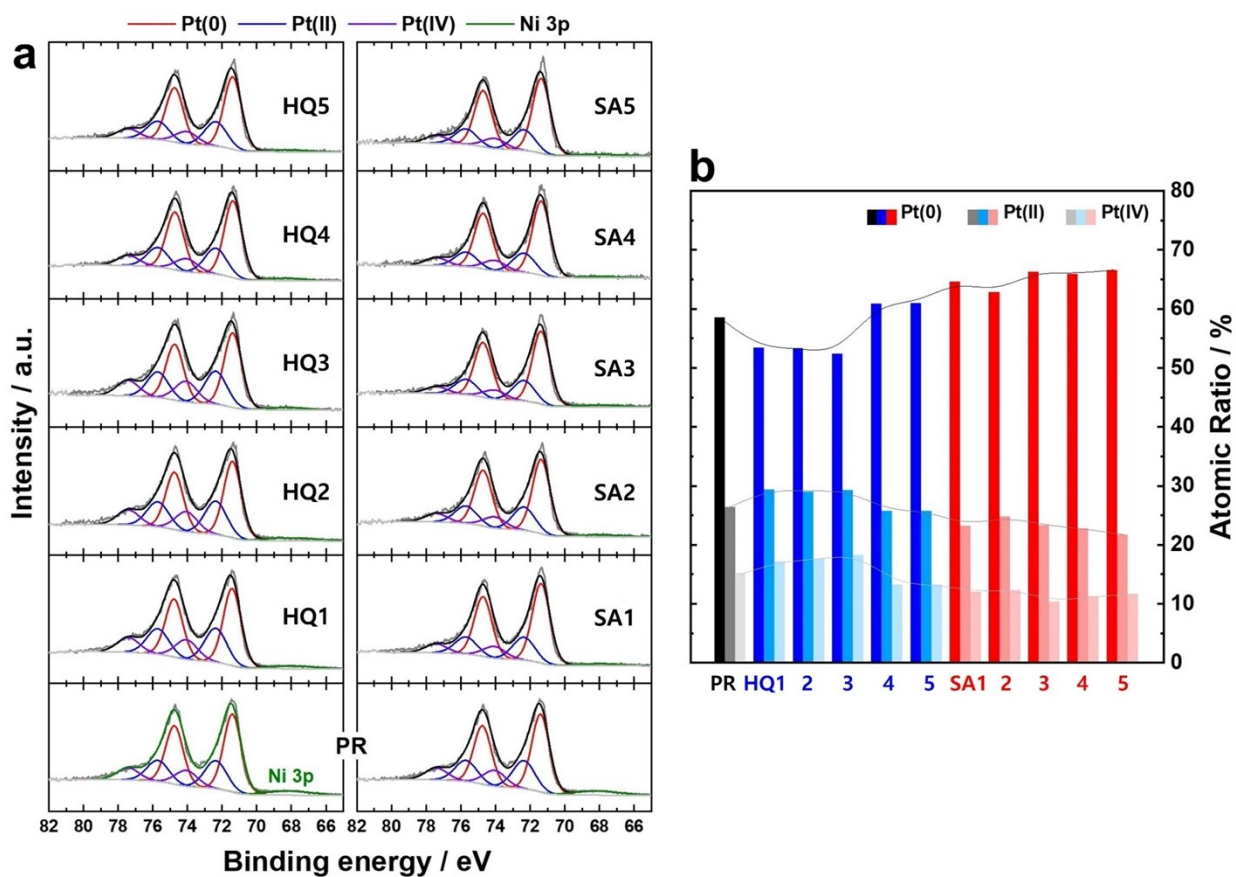

**Fig. S5** Pt 4f core-level photoemission spectra. (a) Pt 4f core-level spectra of Pt-Ni catalysts measured at 140 eV of photon energy. (b) Atomic fractions of metallic Pt, Pt(II), and Pt(IV) obtained by fitting (a) the spectra. Binding energies were calibrated with respect to Au (foil) 4f<sub>7/2</sub> at 84.1 eV. The obtained spectra were curve-fitted using CasaXPS software. Atomic ratios of different states were estimated from the areas of the respective Lorentzian-Gaussian peaks. The broad Ni 3p is also observed and included in the fitting.

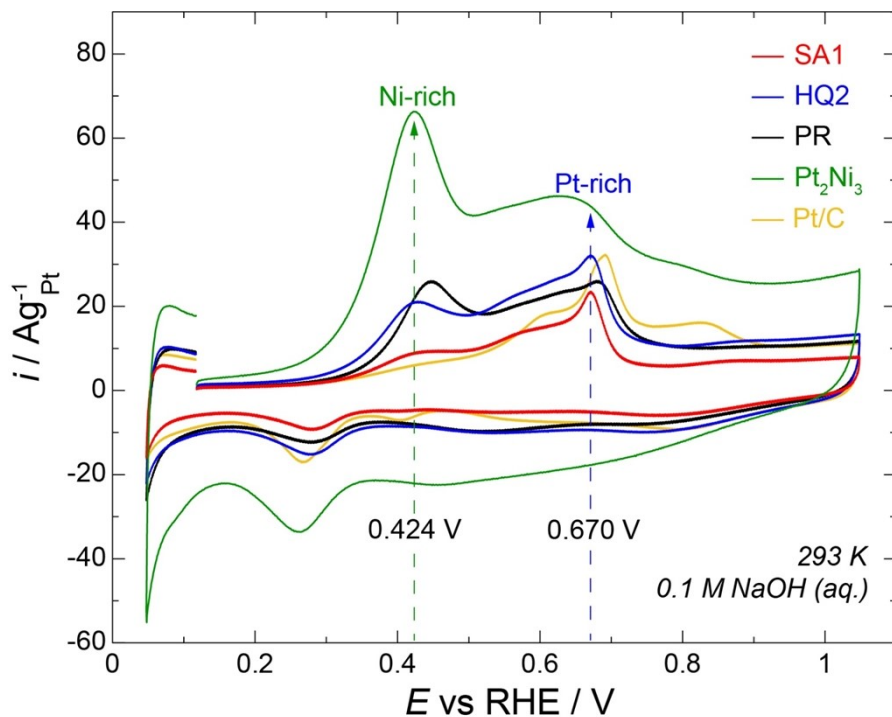

**Fig. S6** CO-stripping scans for Pt-Ni and commercial Pt/C catalysts in 0.1 M NaOH (aq.). The first scan for each catalyst with a rate of 20 mV/s is plotted in the figure. Commercial Pt/C (40 wt% of Pt-loading) and Pt<sub>2</sub>Ni<sub>3</sub>/C (18 wt% of Pt-loading, not included in this study) are plotted as references of pure Pt and Ni-rich surfaces, respectively. Hg/HgO (0.1 M KOH, CH instruments) and glassy carbon rod were used as the reference and counter electrodes, respectively.

#### **Discussion for Figure S6**

In Fig. S6, we focused on the two main peaks associated with the oxidation of CO on specific surfaces sites at approximately 0.42 V (“prewave”) and 0.67 V (“main peak”). The peaks corresponding to 0.42 V and 0.67 V are related to the prewave of high-coverage (weakly bonded) CO<sub>ad</sub> and the oxidation peak of residual low-coverage (strongly bonded) CO<sub>ad</sub>, respectively.<sup>1</sup> Typically, a Pt-rich surface has a lower prewave and a higher main peak at 0.42 V and 0.67 V, as these values are attributed to CO<sub>ad</sub> on Pt atoms in proximity to oxophilic Ni oxides (NiO<sub>x</sub> or Ni(OH)<sub>y</sub>) domains and residual CO<sub>ad</sub> strongly bonded to Pt atoms at higher potentials, respectively, as already reported by Strasser et al.<sup>2</sup>

As shown in Fig. S6, the CO-stripping voltammograms of Pt-Ni and commercial Pt/C show the order of Pt<sub>2</sub>Ni<sub>3</sub>>PR>HQ2>SA1>Pt/C in the prewave peak current, indicating that the surface Pt concentration of HQ2 is higher than Pt<sub>2</sub>Ni<sub>3</sub> and PR, but lower than SA1 and commercial Pt/C. This result is well consistent with the STEM EDS, ED-XRD and NEXAFS results.

## Supplementary Information

**Info. 1** XPS Probing depths at different photon energies.

Pt 4f XPS spectra were obtained at 140 eV of the excitation photon energy at BL10A2 beamline of PAL. In the case of valence band spectra, we obtained the valence band spectra at both 400 eV and 140 eV energies. We can expect the spectra only from the few surface layers owing to the dependence of probing depth on electron kinetic energy. Probing depth is called also as inelastic electron mean free path (IMFP). The IMFP vs. electron kinetic energy (K.E.) dependency, which is called a universal curve for IMFP. According to the universal curve, the IMFPs and the probing depths are calculated as follow:

For Pt 4f<sub>7/2</sub> at  $h\nu = 140$  eV (K.E. = 140-71 = 69 eV), IMFP = 0.48 nm, probing depth ~1.4 nm.

For valence band at  $h\nu = 400$  eV (K.E. = 400 eV), IMFP = 1.1 nm, probing depth ~3.2 nm.

For valence band at  $h\nu = 140$  eV (K.E. = 140 eV), IMFP = 0.65 nm, probing depth ~1.9 nm.

## References for ESI

1. E. Herrero, Q-S. Chen, J. Hernandez, S-G. Sun, J. M. Feliu, *Phys. Chem. Chem. Phys.*, 2011, **13**, 16762-16771.
2. S. Rudi, D. Teschner, V. Beermann, W. Hetaba, L. Gan, C. Cui, M. Gliech, R. Schlogl, P. Strasser, *ACS Catal.*, 2017, **7**, 6376-6384.
